# Supplementary material for: Detecting small plant peptides using SPADA (Small Peptide Alignment Discovery Application)
Source: PubMed Central journal article supplement (PMC3924332; doi:10.1186/1471-2105-14-335), 2013-11-20

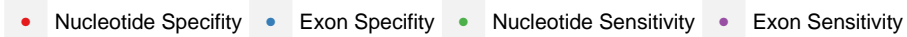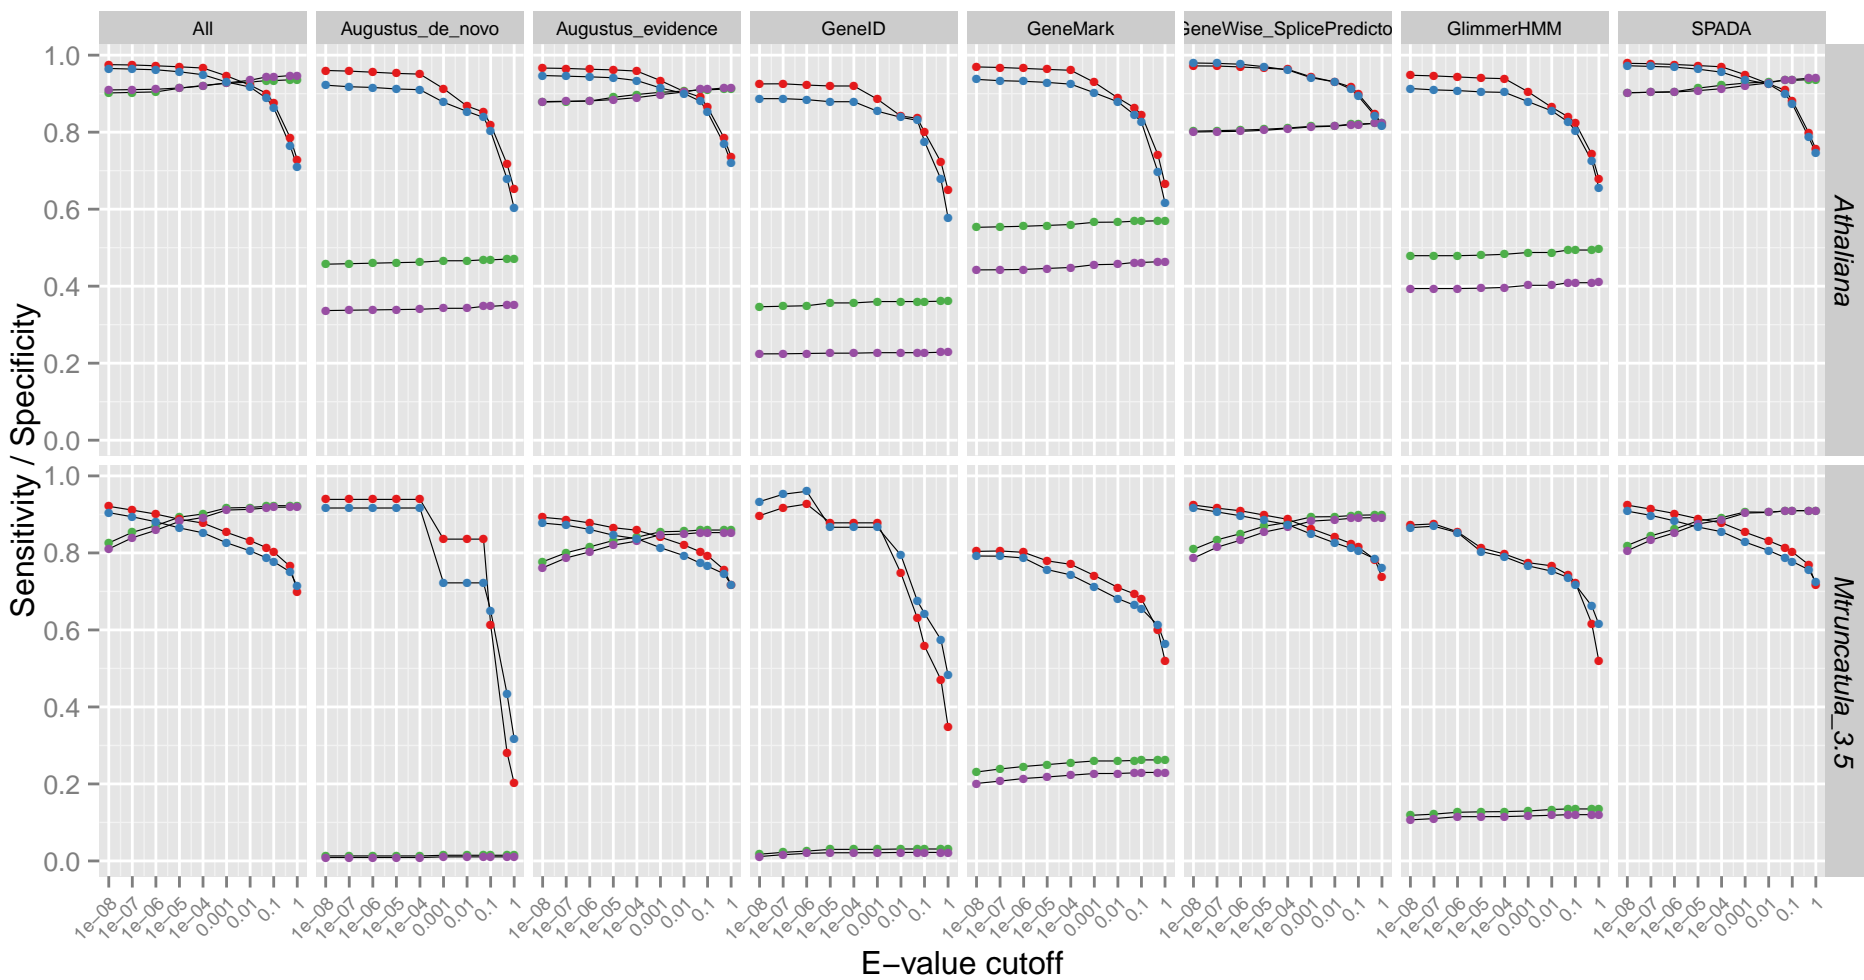

Supplement: 1471-2105-14-335-S4.pdf [file 1471-2105-14-335-S4.pdf]
