# Supplementary material for: Detecting small plant peptides using SPADA (Small Peptide Alignment Discovery Application)
Source: PubMed Central journal article supplement (PMC3924332; doi:10.1186/1471-2105-14-335), 2013-11-20
Supplement: 1471-2105-14-335-S7.pdf [file 1471-2105-14-335-S7.pdf]

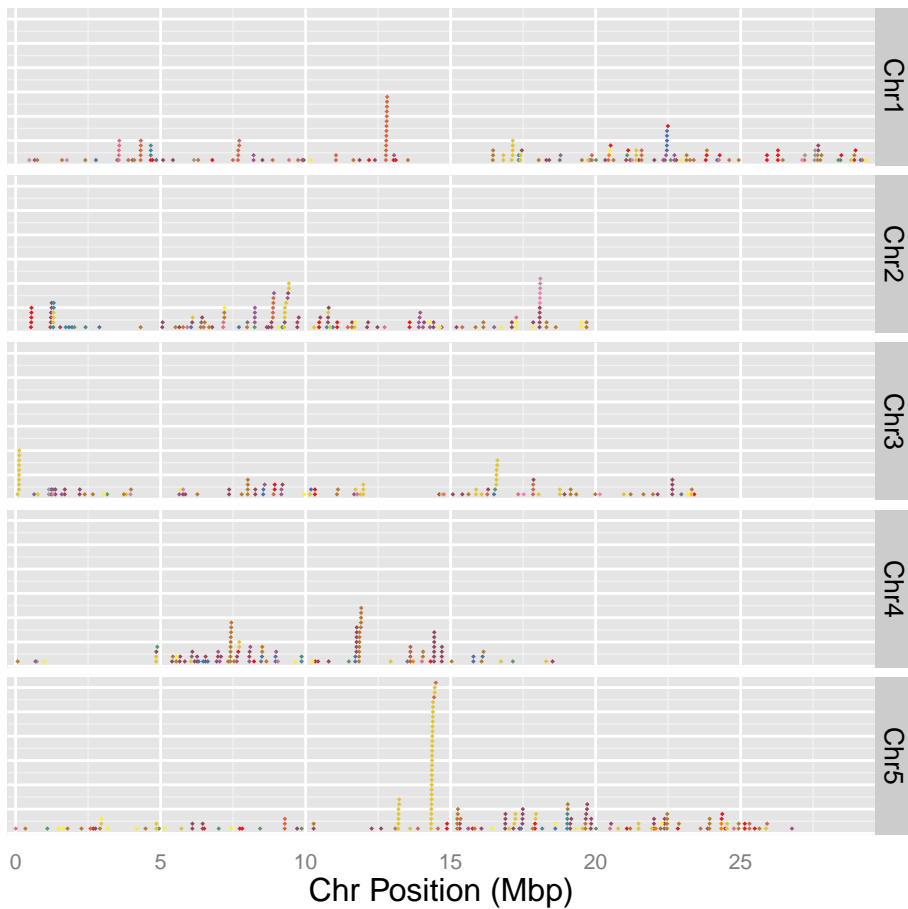

- Defensin related
- LCR/BET1 related
- SCR related
- CCP related
- Nodule Cysteine–Rich peptide
- Novel family
- Miscellaneous
- Rapid Alkalinization Factor
- Thionin related
- Root cap/late embryogenesis
- Antimicrobial peptide MBP–1
- Pollen Ole e I
- ECA1 gametogenesis related
- Lipid transfer protein
- 2S Albumin
- Maternally–expressed gene/Ae1
- Proteinase inhibitor II
- Chitinase/Hevein
- Kunitz type inhibitor
