# Supplementary material for: Detecting small plant peptides using SPADA (Small Peptide Alignment Discovery Application)
Source: PubMed Central journal article supplement (PMC3924332; doi:10.1186/1471-2105-14-335), 2013-11-20
Supplement: 1471-2105-14-335-S10.pdf [file 1471-2105-14-335-S10.pdf]

# CRP0000 (classic defensin)

|     |     |     |     |     |     |     |   |   |   |   |   |   |   |   |   |   |    |   |   |   |   |   |    |   |    |    |    |    |    |   |   |   |   |   |   |   |   |   |   |   |   |   |   |   |   |   |   |   |   |   |   |   |   |   |   |   |   |    |    |    |    |    |    |    |   |   |   |   |   |   |   |   |   |   |   |   |   |   |    |   |   |   |
|-----|-----|-----|-----|-----|-----|-----|---|---|---|---|---|---|---|---|---|---|----|---|---|---|---|---|----|---|----|----|----|----|----|---|---|---|---|---|---|---|---|---|---|---|---|---|---|---|---|---|---|---|---|---|---|---|---|---|---|---|---|----|----|----|----|----|----|----|---|---|---|---|---|---|---|---|---|---|---|---|---|---|----|---|---|---|
| MAR | S   | V   | P   | L   | V   | S   | T | I | F | V | F | L | L | L | V | A | -- | T | G | P | S | M | V  | A | -- | E  | A  | R  | T  | C | E | S | Q | S | H | K | F | K | G | P | C | A | S | D | H | N | C | A | S | V | C | Q | T | E | R | F | S | -- | G  | G  | H  | C  | R  | G  | F | R | R | R | C | F | C | T | H | C | * |   |   |   |    |   |   |   |
| MAR | S   | V   | S   | L   | V   | S   | T | I | F | V | F | F | L | L | I | V | A  | T | E | M | G | P | S  | M | V  | A  | -- | -- | A  | R | T | C | E | T | P | S | N | S | F | K | G | A | C | F | S | D | T | N | C | A | S | V | C | Q | T | E | G | F  | P  | -- | G  | G  | H  | C  | K | G | F | R | Q | R | C | F | C | T | K | P | C | * |    |   |   |   |
| MAR | S   | L   | P   | L   | V   | S   | T | I | F | V | F | F | L | L | L | V | A  | T | E | M | G | P | I  | M | V  | A  | -- | -- | E  | A | R | T | C | E | T | P | S | N | N | F | K | G | L | C | V | S | D | T | N | C | A | S | V | C | Q | T | E | G  | F  | P  | -- | G  | G  | H  | C | E | G | F | R | Q | R | C | F | C | T | K | P | C | *  |   |   |   |
| MAR | S   | I   | T   | L   | V   | C   | T | I | F | F | F | L | L | L | V | S | T  | E | M | Q | P | T | H  | V | E  | E  | P  | -- | E  | A | R | T | C | D | S | Q | S | H | S | F | K | G | V | C | W | I | K | H | N | C | A | N | V | C | K | T | E | G  | F  | T  | -- | G  | G  | H  | C | H | G | F | R | R | R | C | F | C | S | K | P | C | *  |   |   |   |
| MAR | S   | V   | P   | L   | V   | S   | T | I | F | V | F | L | L | L | V | A | -- | T | G | P | S | M | V  | A | -- | -- | E  | A  | R  | T | C | E | S | Q | S | H | K | F | K | G | P | C | A | S | D | H | N | C | A | S | V | C | Q | T | E | R | F | S  | -- | G  | G  | H  | C  | R  | G | F | R | R | R | C | F | C | T | H | C | * |   |   |    |   |   |   |
| MAR | S   | V   | S   | L   | V   | S   | T | I | F | V | F | F | L | L | I | V | A  | T | E | M | G | P | S  | M | V  | A  | -- | -- | A  | R | T | C | E | T | P | S | N | S | F | K | G | A | C | F | S | D | T | N | C | A | S | V | C | Q | T | E | G | F  | P  | -- | G  | G  | H  | C  | K | G | F | R | Q | R | C | F | C | T | K | P | C | * |    |   |   |   |
| MAR | S   | L   | P   | L   | V   | S   | T | I | F | V | F | F | L | L | L | V | A  | T | E | M | G | P | I  | M | V  | A  | -- | -- | E  | A | R | T | C | E | T | P | S | N | N | F | K | G | L | C | V | S | D | T | N | C | A | S | V | C | Q | T | E | G  | F  | P  | -- | G  | G  | H  | C | E | G | F | R | Q | R | C | F | C | T | K | P | C | *  |   |   |   |
| MA  | L   | Q   | F   | L   | S   | I   | R | T | I | F | L | F | L | L | V | L | V  | A | T | E | M | G | S  | I | M  | V  | V  | -- | -- | E | A | R | K | C | L | S | Q | S | H | S | F | K | G | L | C | L | S | D | Q | N | C | A | T | V | C | L | T | E  | G  | F  | T  | -- | D  | G  | R | C | R | G | F | R | Q | R | C | F | C | S | K | P | C  | L |   |   |
| --- | --- | --- | --- | --- | --- | --- | M | E | R | K | T | L | W | F | L | F | M  | L | F | L | L | A | A  | D | I  | A  | V  | K  | T  | A | E | G | R | R | C | E | S | K | S | H | K | F | K | G | P | C | S | R | D | S | N | C | A | S | V | C | R | G  | E  | G  | F  | T  | -- | G  | G | D | C | R | G | F | R | R | R | C | F | C | T | R | N  | C | * |   |
| --- | --- | --- | --- | --- | --- | --- | M | E | R | K | T | L | G | I | L | F | M  | L | F | L | V | L | A  | A | D  | V  | A  | V  | K  | T | A | E | G | R | R | C | E | S | Q | S | H | K | F | K | G | P | C | V | S | D | S | N | C | G | S | V | C | R  | G  | E  | G  | F  | I  | -- | G | G | D | C | R | G | V | R | H | R | C | F | C | T | R  | N | C | * |
| --- | --- | --- | --- | --- | --- | --- | M | N | K | A | R | F | G | F | F | F | I  | L | L | I | L | L | T  | F | E  | M  | V  | V  | Q  | T | E | G | R | K | H | C | R | E | K | S | R | L | F | E | E | L | C | F | N | S | E | D | C | A | N | T | C | R  | Y  | E  | G  | F  | H  | L  | G | G | K | C | W | G | L | F | R | T | C | Y | C | K | K  | K | R | * |
| --- | --- | --- | --- | --- | --- | --- | M | N | K | T | R | F | G | F | F | F | I  | L | L | I | L | L | A  | S | Q  | M  | M  | V  | Q  | T | E | G | R | H | C | E | S | K | S | H | R | F | K | G | M | C | M | S | D | H | N | C | A | S | V | C | H | V  | E  | G  | F  | P  | -- | G  | G | N | C | R | G | F | R | R | R | C | F | C | K | K | R  | C | * |   |
| MA  | S   | S   | R   | K   | L   | L   | A | A | V | L | L | L | L | L | L | L | V  | A | T | E | M | G | -- | V | V  | A  | -- | -- | E  | A | R | T | C | E | S | Q | S | H | R | F | K | G | P | C | V | S | D | T | N | C | A | S | V | C | R | T | E | G  | F  | P  | -- | G  | G  | E  | C | R | G | F | R | R | R | C | F | C | T | K | P | C | -- |   |   |   |

# CRP1400 (nodule-specific defensin-like peptide)

|     |     |     |     |     |     |     |   |   |   |   |   |   |   |   |   |   |   |   |   |   |     |     |     |     |     |     |     |     |     |     |   |   |   |   |   |   |   |   |   |   |   |   |    |   |   |    |    |    |     |     |    |     |     |     |     |     |     |     |   |   |   |   |   |     |     |     |   |   |     |
|-----|-----|-----|-----|-----|-----|-----|---|---|---|---|---|---|---|---|---|---|---|---|---|---|-----|-----|-----|-----|-----|-----|-----|-----|-----|-----|---|---|---|---|---|---|---|---|---|---|---|---|----|---|---|----|----|----|-----|-----|----|-----|-----|-----|-----|-----|-----|-----|---|---|---|---|---|-----|-----|-----|---|---|-----|
| M   | T   | Q   | I   | L   | L   | F   | V | Y | F | F | I | I | F | L | S | L | S | F | V | T | S   | --- | --- | --- | --- | --- | Y   | R   | T   | R   | I | P | C | V | S | D | Y | D | C | P | K | A | S  | Y | P | L  | F  | -- | I   | K   | -- | C   | I   | --- | --- | Y   | N   | F   | C | E | I | W | G | S   | P   | *   |   |   |     |
| M   | T   | Q   | I   | V   | I   | L   | F | Y | V | L | I | I | F | L | - | I | L | F | P | V | E   | T   | --- | --- | --- | --- | --- | I   | R   | T   | Q | I | S | C | V | S | D | D | D | C | P | K | V  | P | Y | P  | L  | Y  | --  | I   | K  | --  | C   | E   | --- | --- | D   | N   | F | C | D | I | W | A   | S   | P   | Y |   |     |
| MA  | Q   | F   | L   | M   | F   | I   | Y | V | L | I | I | F | L | Y | L | F | Y | V | E | A | A   | M   | F   | E   | L   | T   | -   | K   | S   | T   | I | R | C | V | T | D | A | D | C | P | N | V | V  | K | P | L  | K  | -- | P   | K   | -- | C   | V   | --- | --- | D   | G   | F   | C | E | Y | T | * | --- | --- |     |   |   |     |
| MA  | H   | F   | L   | M   | F   | V   | Y | A | L | I | T | C | L | S | L | F | L | V | E | M | --- | --- | --- | --- | --- | G   | -   | H   | L   | S   | I | H | C | V | S | V | D | D | C | P | K | V | E  | K | P | I  | T  | -- | M   | K   | -- | C   | I   | --- | --- | N   | N   | Y   | C | K | Y | F | V | D   | H   | K   |   |   |     |
| MV  | H   | I   | L   | M   | F   | V   | Y | A | L | I | F | S | N | F | I | F | L | V | E | A | N   | --- | --- | --- | --- | --- | M   | V   | V   | L   | G | C | V | S | D | D | D | C | P | K | V | P | L  | P | R | F  | -- | L  | K   | --  | C  | I   | --- | --- | A   | N   | L   | C   | L | V | R | K | K | D   |     |     |   |   |     |
| --- | --- | --- | --- | --- | --- | --- | M | F | L | Y | A | L | I | T | F | L | F | L | F | V | E   | T   | S   | T   | T   | --- | --- | --- | N   | T   | K | T | T | I | P | C | K | F | D | N | D | C | P  | E | I | S  | Y  | P  | L   | I   | -- | L   | M   | --  | C   | I   | --- | --- | D | D | F | C | E | Y   | L   | L   | A | * | --- |
| M   | G   | Q   | I   | L   | I   | F   | V | F | A | L | I | N | F | L | S | P | I | L | V | E | M   | T   | --- | --- | --- | --- | --- | T   | T   | T   | I | P | C | T | S | I | D | D | C | P | K | M | -- | P | L | V  | -- | V  | K   | --  | C  | I   | --- | --- | D   | N   | F   | C   | N | Y | F | E | I | K   | *   |     |   |   |     |
| M   | G   | Q   | I   | L   | I   | F   | V | F | A | L | I | N | F | L | S | P | I | L | V | E | M   | T   | --- | --- | --- | --- | --- | T   | T   | T   | I | P | C | T | S | I | D | D | C | P | K | M | -- | P | L | V  | -- | V  | K   | --  | C  | I   | --- | --- | D   | N   | F   | C   | N | Y | F | E | I | K   | *   |     |   |   |     |
| MA  | Q   | I   | L   | M   | F   | I   | Y | D | L | I | I | F | L | S | I | F | I | V | T | N | G   | G   | --- | --- | --- | --- | --- | L   | I   | P   | C | V | S | D | A | D | C | P | E | E | - | L | A  | L | V | -- | M  | K  | --  | C   | I  | --- | --- | N   | K   | L   | C   | E   | L | V | M | E | * | --- |     |     |   |   |     |
| M   | S   | Q   | V   | M   | F   | V   | Y | T | L | I | I | F | L | F | P | S | H | V | I | T | N   | --- | --- | --- | --- | --- | K   | I   | A   | I   | Y | C | V | S | D | D | D | C | L | K | T | F | T  | P | L | D  | -- | L  | K   | --  | C  | V   | --- | --- | D   | N   | V   | C   | E | F | N | L | * | --- | --- |     |   |   |     |
| MA  | Q   | T   | L   | M   | L   | V   | Y | A | L | I | I | F | T | S | L | F | L | V | V | I | S   | --- | --- | --- | --- | --- | R   | Q   | T   | D   | I | P | C | K | S | D | D | A | C | P | R | V | S  | S | H | H  | -- | I  | E   | --  | C  | V   | --- | --- | K   | G   | F   | C   | T | Y | W | K | L | D   | *   |     |   |   |     |
| MA  | K   | V   | Y   | M   | F   | V   | Y | A | L | I | I | F | V | S | P | F | L | A | T | F | --- | --- | --- | --- | --- | --- | R   | T   | R   | L   | P | C | E | K | D | D | D | C | P | E | A | F | L  | P | P | V  | -- | M  | K   | --  | C  | V   | --- | --- | N   | R   | F   | C   | Q | Y | E | I | L | E   | *   |     |   |   |     |
| MA  | K   | F   | S   | M   | F   | V   | Y | A | L | I | N | F | L | S | L | F | L | V | E | T | --- | --- | --- | --- | --- | A   | -   | I   | T   | N   | I | R | C | V | S | D | D | D | C | P | K | V | I  | K | P | L  | V  | -- | M   | K   | -- | C   | I   | --- | --- | G   | N   | Y   | C | Y | F | F | M | I   | Y   | E   |   |   |     |
| --- | --- | --- | --- | --- | --- | --- | M | I | F | Y | H | V | L | I | T | L | F | C | Y | L | F   | F   | I   | T   | I   | Q   | --- | --- | --- | --- | F | L | P | S | P | C | E | T | D | D | D | C | Q  | E | I | G  | V  | R  | --- | --- | K  | I   | --- | --- | R   | E   | V   | C   | R | Y | F | A | K | I   | H   |     |   |   |     |
| M   | T   | Q   | F   | L   | F   | F   | I | F | V | L | M | I | F | L | S | P | F | L | V | E | M   | E   | --- | --- | --- | --- | --- | K   | T   | H   | V | R | C | I | T | A | D | D | C | P | K | V | E  | R | P | L  | K  | -- | M   | K   | -- | C   | I   | --- | --- | G   | N   | Y   | C | H | Y | F | L | N   | N   | F   |   |   |     |
| MA  | Q   | L   | I   | I   | F   | V   | Y | A | L | I | I | F | L | Y | L | L | F | V | E | A | Q   | --- | --- | --- | --- | --- | I   | T   | K   | L   | P | C | V | T | V | D | D | C | P | K | V | E | K  | P | I | P  | -- | M  | V   | A   | K  | C   | F   | G   | K   | S   | F   | S   | R | H | C | H | Y | F   | *   | --- |   |   |     |
| MA  | Q   | I   | L   | M   | F   | V   | Y | F | L | I | I | F | L | S | L | F | L | V | E | S | I   | K   | I   | --- | --- | --- | F   | -   | T   | E   | H | R | C | R | T | D | A | D | C | P | A | R | E  | L | P | E  | Y  | -- | L   | K   | -- | C   | Q   | --- | --- | G   | G   | M   | C | R | L | L | I | K   | K   | D   |   |   |     |
| --- | --- | --- | --- | --- | --- | --- | M | F | V | Y | V | L | I | I | F | L | S | L | F | L | I   | E   | A   | --- | --- | --- | --- | --- | S   | I   | K | T | K | I | A | C | V | T | D | N | D | C | P  | R | A | I  | K  | P  | V   | V   | -- | M   | W   | --  | C   | I   | --- | --- | N | N | Y | C | H | Y   | L   | Y   | G | Y |     |
| MA  | Q   | S   | L   | I   | F   | V   | Y | A | L | I | I | F | L | F | L | F | R | V | E | A | --- | --- | --- | --- | --- | E   | -   | H   | L   | K   | I | R | C | V | T | D | D | D | C | P | K | V | E  | K | P | L  | Y  | -- | M   | Y   | -- | C   | G   | --- | --- | N   | H   | W   | C | A | Y | K | L | H   | F   | V   |   |   |     |
| M   | T   | Q   | F   | I   | F   | F   | I | Y | V | L | M | I | F | L | S | L | F | L | V | E | S   | E   | --- | --- | --- | --- | --- | K   | L   | D   | I | R | C | A | T | V | D | D | C | P | K | V | T  | K | P | V  | V  | -- | M   | M   | -- | C   | T   | --- | --- | G   | K   | F   | C | H | Y | F | V | R   | K   | I   |   |   |     |
| MA  | Q   | L   | I   | I   | F   | V   | Y | A |   |   |   |   |   |   |   |   |   |   |   |   |     |     |     |     |     |     |     |     |     |     |   |   |   |   |   |   |   |   |   |   |   |   |    |   |   |    |    |    |     |     |    |     |     |     |     |     |     |     |   |   |   |   |   |     |     |     |   |   |     |
