# Supplementary material for: Detecting small plant peptides using SPADA (Small Peptide Alignment Discovery Application)
Source: PubMed Central journal article supplement (PMC3924332; doi:10.1186/1471-2105-14-335), 2013-11-20
Supplement: 1471-2105-14-335-S21.pdf [file 1471-2105-14-335-S21.pdf]

# CRP1280

```
MEKISAFFVILFLVSSCLVTM---SVGDIQTDRCVVEIGIPRCKRTEGKMPICYNGYCCICSAKRLPASTTRKPPSPSTSKLV*  
MDAILKFIYAMFLFLFLFVTTTRNVEALFECNRDFVCGNDD--EC-VYPYAVQCIHRYCKCLKSRN*-----  
MIEIIFKFIYIMIFFISIFFVVSSESLFIPENRTEPCD--N--VC-LYPKVSLCIWWYCTCVTVK*-----  
MIEIIFKFIYIMIFFISIFFVVSSESLFIPENRTEPCD--N--VC-LYPKVSLCIWWYCTCVTVK*-----  
MDAILKFIYAMFLFLFLFVTTTRNVEALFECNRDFVCGNDD--EC-VYPYAVQCIHRYCKCLKSRN*-----  
---MKFVHAMILFLFLFAIN-VTAFRDPNFDPCRN-S--NC-TAPYVATCMYEHCYC*-----
```

# CRP1300

```
MEKVTSTIFFVLLLI-S SCLLIL-----RSQGGQFRCKSVAECDSTRGCRVGTHTVICN-----EHHICTCAHGSPIGGQCD  
-MSE-----IFKSYFYIMIFIISLIFFFS-----YALYCNDEIECNPENCPLPLTIVICT-----GDNMCMCLEPFQFFEQP*  
MSYILKSLYDMIFFYFIIFVVENVSAT-----YGFYCDDDVPNCNPHLCLPP LQVICG-----GDFLCFCIYQ*-----  
-MSILKVFLLYDHLIFSIFFFVGNVSAT-----YALYCNDEIECNPENCPLPLTIVICT-----GDNMCMCLEPFQFFEQP*  
MSYILKSLYDMIFFYSLFFVVENVSAT-----YGFYCDDDVPNCNPHLCLPP LQVICG-----GDFLCFCIYQ*-----  
MIKFLKFFYATIIIL-ISIFFV-----DNVCYSLCLPPFVGICT-----D-YQCI CLIR*-----  
MSKFLKFIYVILIL-SFLFYVERGVSSA-----SPFYCVDDDYFCFGLCLPPMIDHCT-----LRGQCICITISTEVES*  
MTKAIKFIYIMILFLPPILVGAAGEIP-----YHQCKFDMECMLMKCVPGKVNVC S-----LGRCYCVNS*-----  
MSKFLKFIYVILIL-SFLFYVERGVSSA-----SPFYCVDDDYFCFGLCLPPMIDHCT-----LRGQCICITISTEVES*  
MTKILKFFYAMIIIL-LSLFLA AIDADV--NCTSVLQCF--YCY--L-HGTMLC-----LNGQCLCV*-----  
MTEIIFKFNVMIIIL-LSVFIAMNVNASPVLCQRNYECY-----EQICLPPKKHWCNILELVRINGFYLGACI*-----  
MSEIVKFIYLMIIIF-LSLFIIVAMNANAFS-ICQNSDCKD-----QEICLPPKKHWCNKIVPMIEETMVGNCCECI*-----
```

# CRP1510

```
----MSCFSFLVYFLFLFIVTKMSQSVSSHE-----FTVVSPLYLSCFGIEECLFYL-----YFKLYDLCVILLCTWFDLSE*  
MAQKFMFFYALIFLSSFYVI-I-----NTIDPPHHI---TNHEIPCKYNHDCPTIL-----DYISICPYHYCEFWRTY*--  
MAKLVKLVYVIVFYTLFLVATE-----IVSG-----IPCNDVDVDCPQTLCEQLIADFKYMIDFKSECVSRMCACTGSPV*--  
MAKLVKLVYVIVFYTLFLVATE-----IVSG-----IPCNDVDVDCPQTLCEQLIADFKYMIDFKSECVSRMCACTGSPV*--  
MVELLKFFVYVMIFFLFLFFVT-----ACGGKTHYSEIECKNADDCPIGY-----KCIDEMCKYG*-----  
MAQIMFFYALIFLSPFLVD-R-----RSF-PSFVSPKSYTSEIPCKATRDCEPYEL-----YETKCVDSLCTYW*-----  
MTKILMIGYALMIFFLSIAVSITGILTLHNILSDISGNLARASRKKPVDVIPCIYDHDCPRKL-----YFLERCVGRVCKYL*-----  
MAQRFMFIYALIFLSPFFV--I-----NTSDIPNNSNRNSPKEDVFCNSNDDCPTIL-----YVSKCVYNFC EYW*-----  
MAQIMFFYALIFLSPFLVD-R-----RSF-PSFVSPKSYTSEIPCKATRDCEPYEL-----YETKCVDSLCTYW*-----  
MTKILMIGYALMIFFLSIAVSITG-----DISGNLARASRKKPVDVIPCIYDHDCPRKL-----YFLERCVGRVCKYL*-----  
MAQRFMFIYALIFLSPFFV--I-----NTSDIPNNSNRNSPKEDVFCNSNDDCPTIL-----YVSKCVYNFC EYW*-----  
MAQRFMFIYALIFLSPFFV--I-----NTSDIPNNSNRNSPKEDVFCNSNDDCPTIL-----YVSKCVYNFC EYW*-----
```
